# Supplementary material for: Major cell-types in multiomic single-nucleus datasets impact statistical modeling of links between regulatory sequences and target genes
Source: PubMed Central journal article supplement (PMC9998442; doi:10.1038/s41598-023-31040-w), 2023-03-09
Supplement: 41598_2023_31040_MOESM1_ESM.pdf [file 41598_2023_31040_MOESM1_ESM.pdf]

**Supplementary Figure 1.** Clustering of 11,331 PBMC using (A) ATACseq and (B) RNAseq data. The data is embedded using uniform manifold approximation and projection (UMAP). The Euclidean distance of mean expression by cell-type represented as dendrogram shows mononuclear phagocytes as a distinct cell archetype (CD14, CD16 and cDC2).

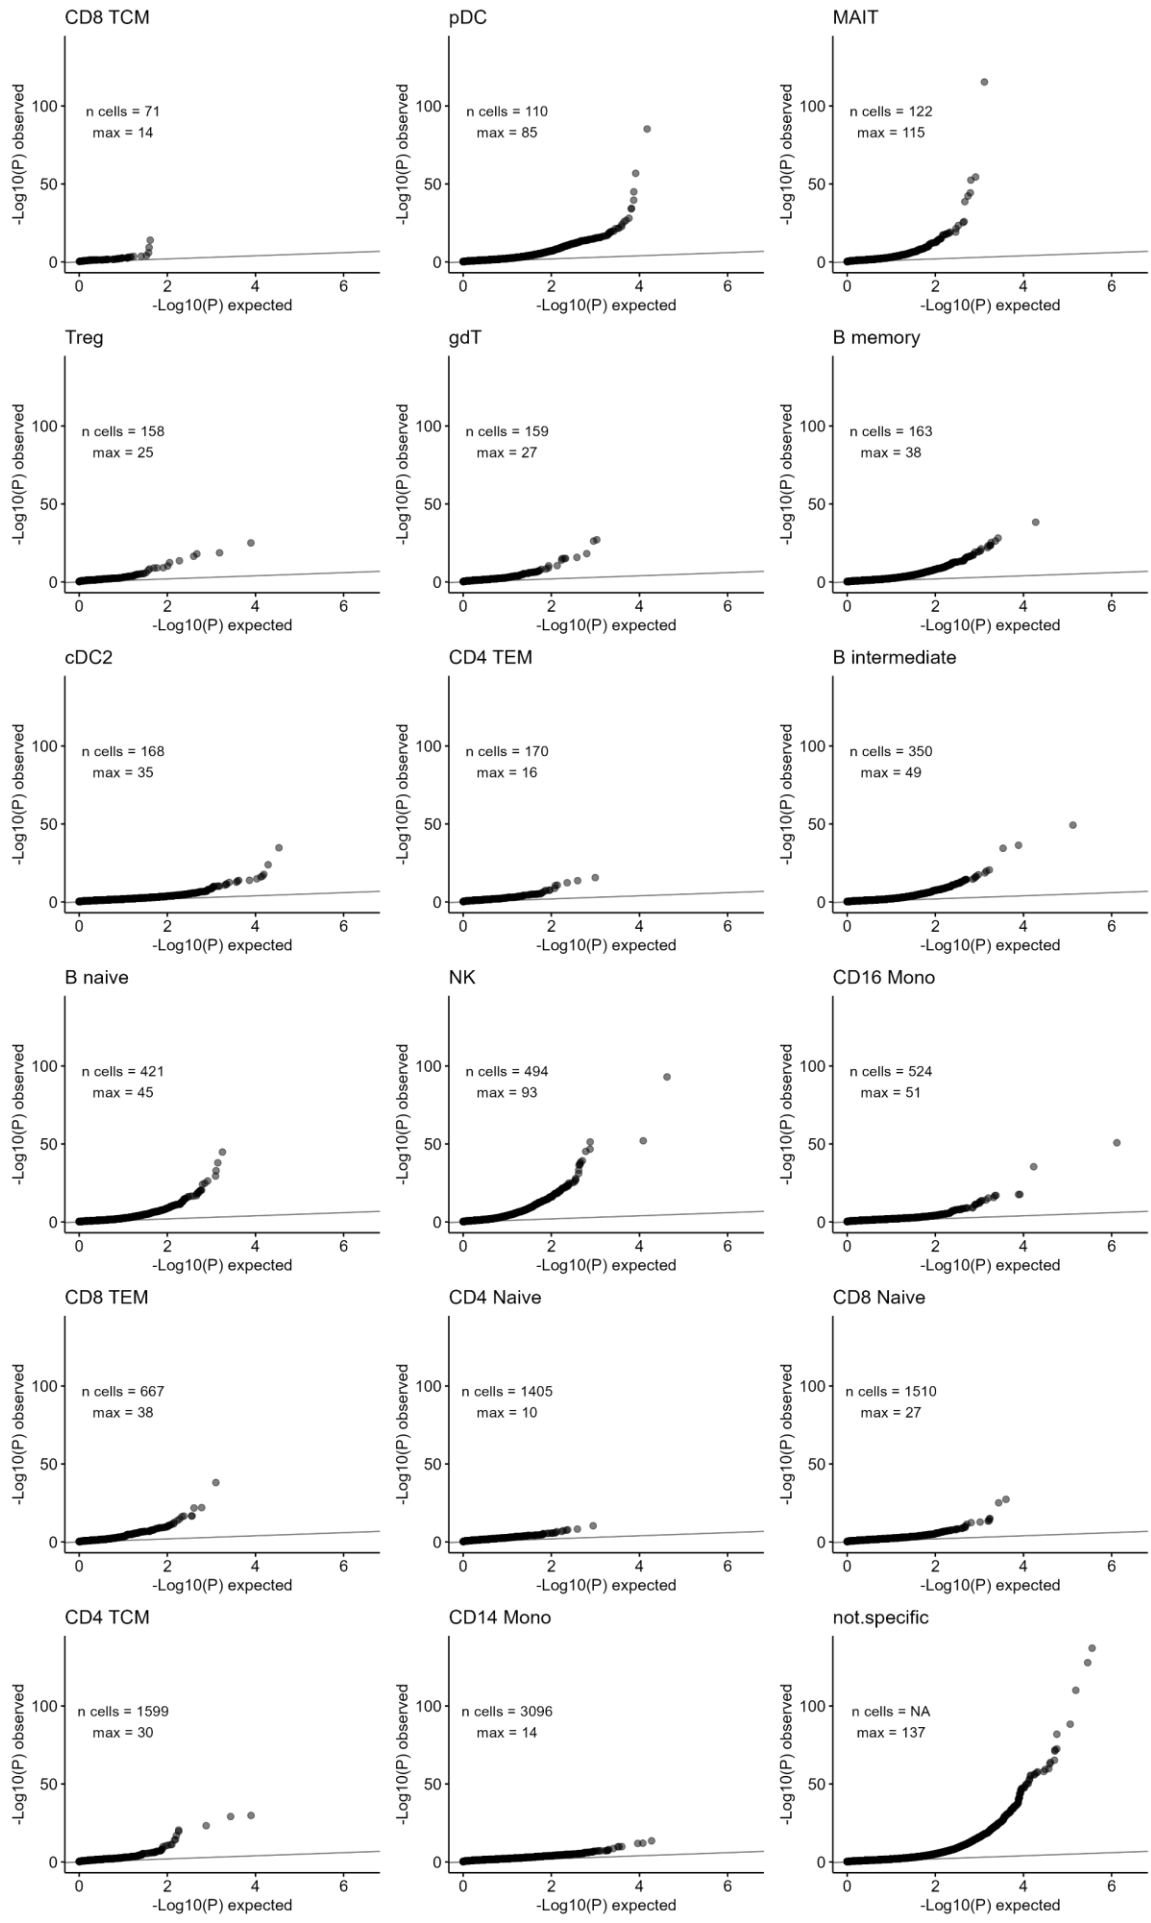

**Supplementary Figure 2.** Distributions of ATACseq peaks-gene link statistics calculated using the Z-scores method as implemented in Signac. The peak-gene links with  $|\text{Pearson } R > 0.01|$  were attributed to specific cell-type (cell-types with  $n > 50$  cells) using the peak's specificity of accessibility (**Methods**). Mono; Monocytes, cDC; classical Dendritic cells, NK; Natural killer cells, pDC; progenitor Dendritic cells, TEM; T effector memory cells, TCM; T central memory cells, gdT; Gamma delta ( $\gamma\delta$ ) T cells, MAIT; mucosal-associated invariant T cells, Treg; regulatory T cells, Max; maximal  $-\log_{10}(\text{P-value})$  calculated for a given cell-type.

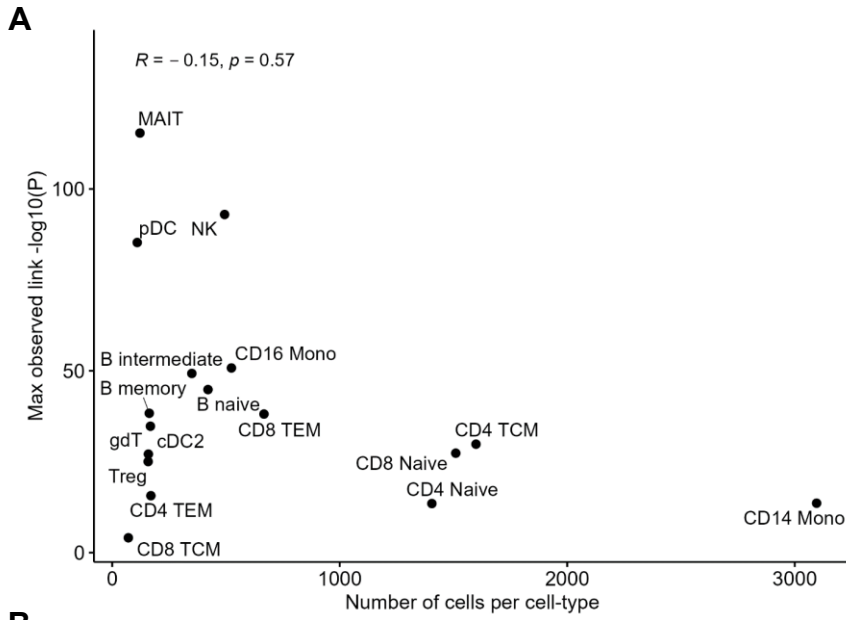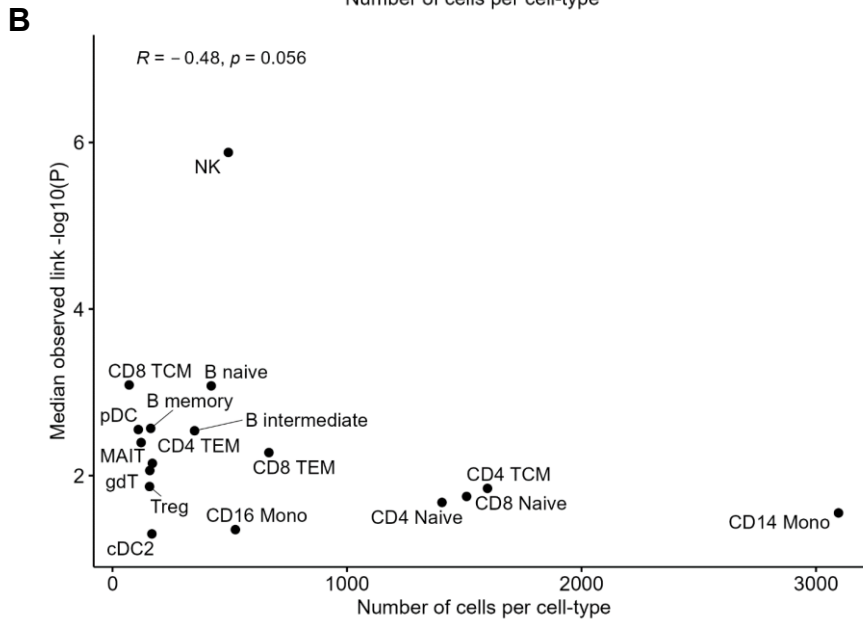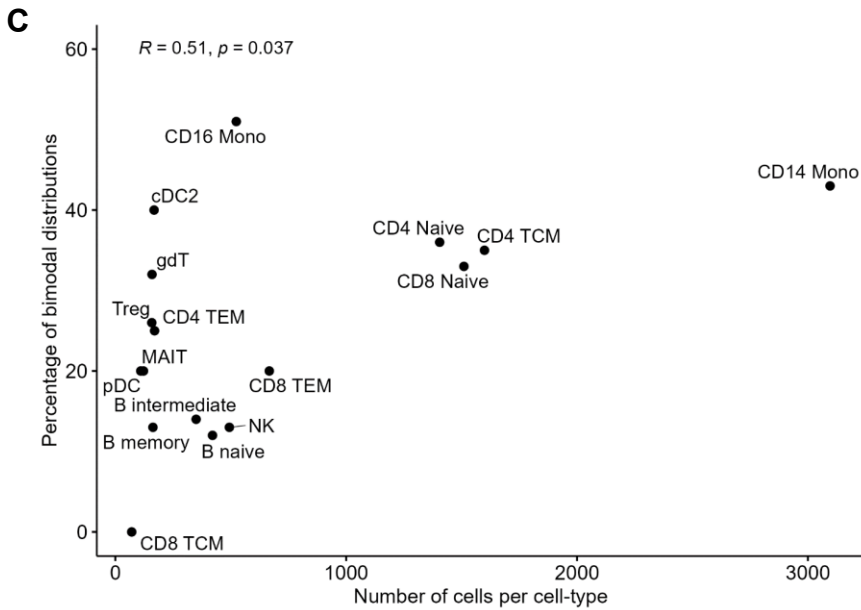

**Supplementary Figure 3.** The impact of cell-type counts on properties of the Z-scores method implemented in Signac. For cell-type-specific ATACseq peaks, we identified peak-gene links and compared (A) the most extreme P-value from the Z-score method, (B) the median P-value from the Z-score method, or (C) the percentage of bimodal null distributions with the number of cells in that cell-type. P-values are from the Spearman correlation test. Mono; Monocytes, cDC; classical Dendritic cells, NK; Natural killer cells, pDC; progenitor Dendritic cells, TEM; T effector memory cells, TCM; T central memory cells, gdT; Gamma delta ( $\gamma\delta$ ) T cells, MAIT; mucosal-associated invariant T cells, Treg; regulatory T cells.

**A****All peaks in background**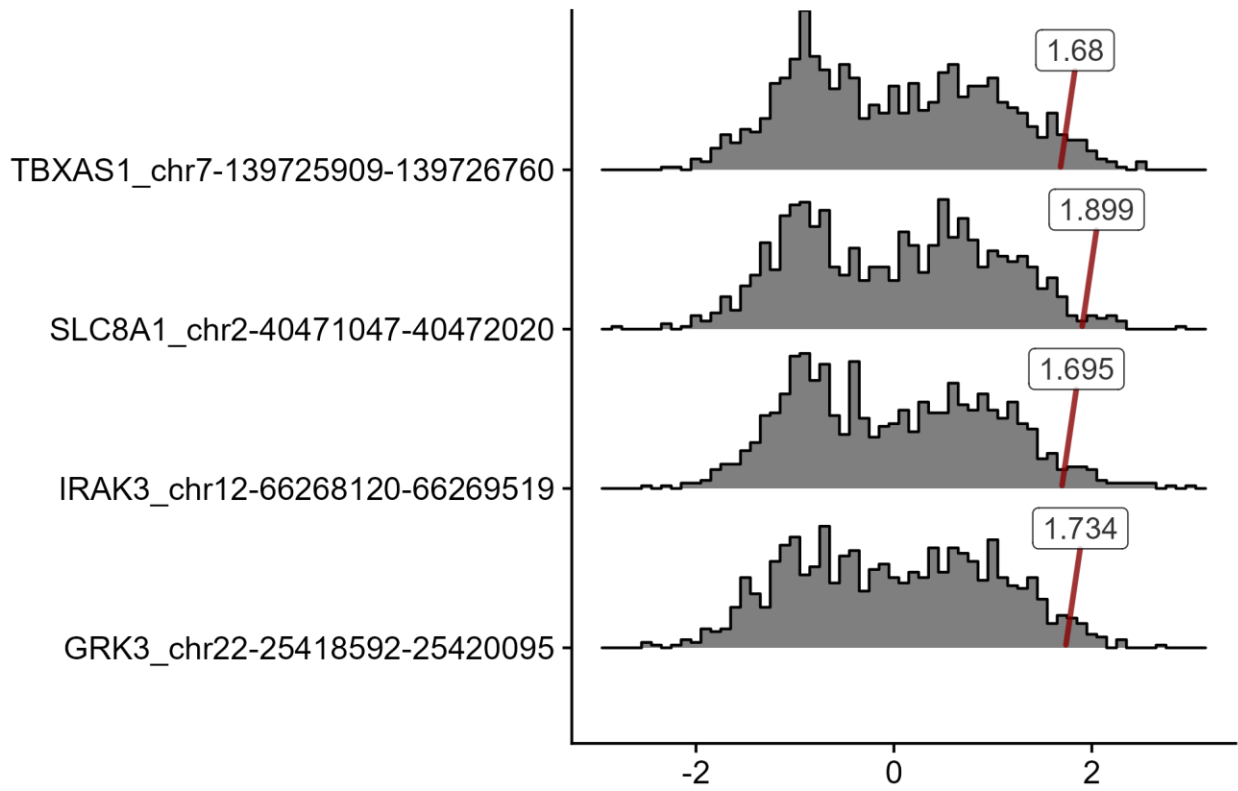**B****No specific peaks in background**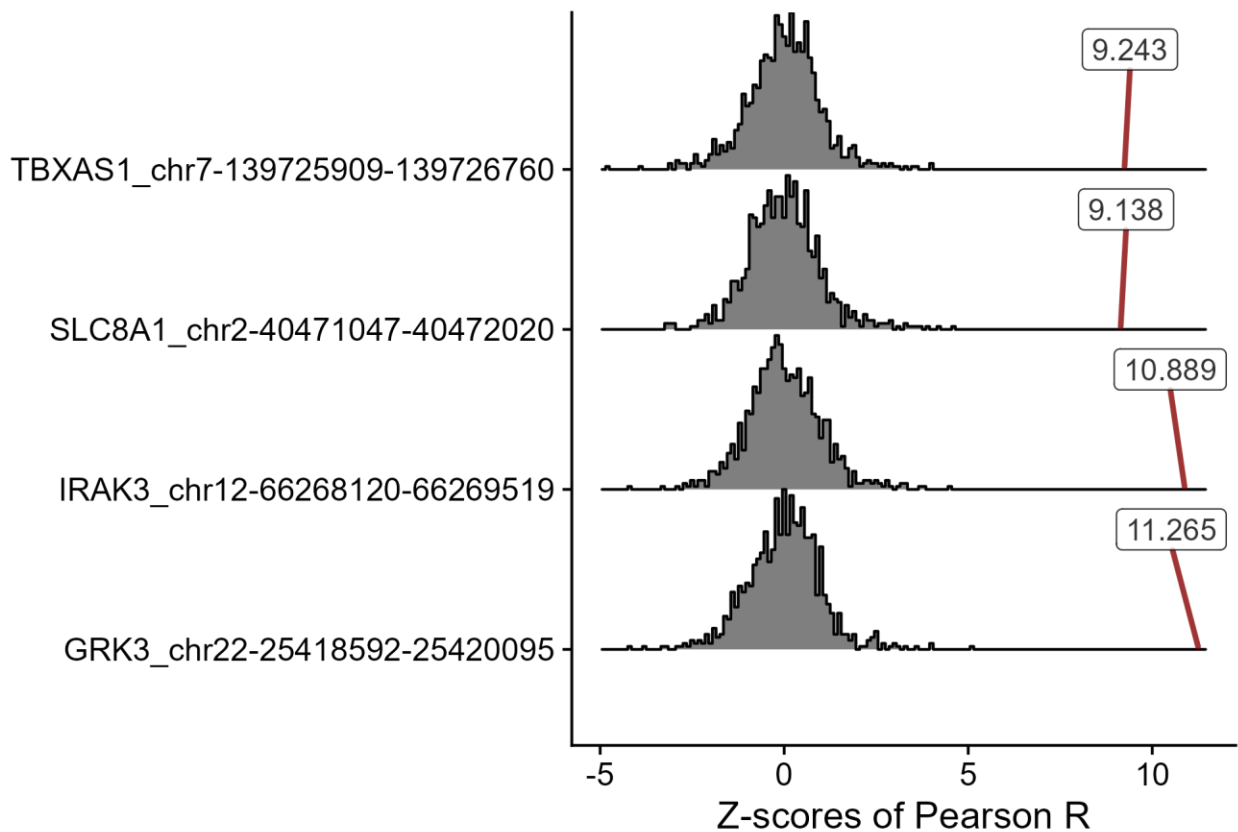

Null distributions of 1000 matching peaks

**Supplementary Figure 4.** Other examples of bimodal null distributions generated by the Z-scores method. Four GC- and count-matched null distributions with high Pearson R coefficients and low Z-scores. Labeled boxes represent the Z-scores for the tested cCRE and its linked gene (*y*-axis names: *gene\_peak*) against the null distributions (**A**) before and (**B**) after removing from the dataset *trans* ATACseq peaks that are specific to the cell-type in which the cCRE is mostly accessible.



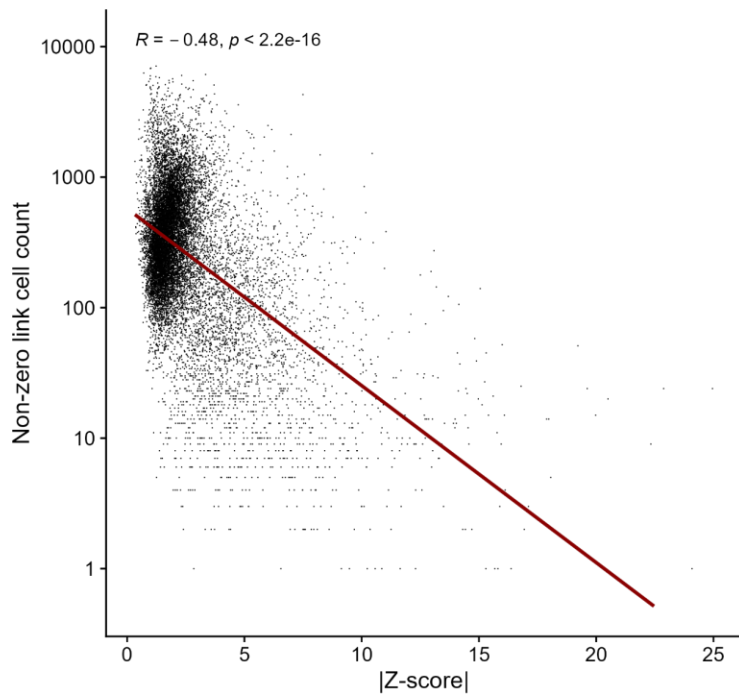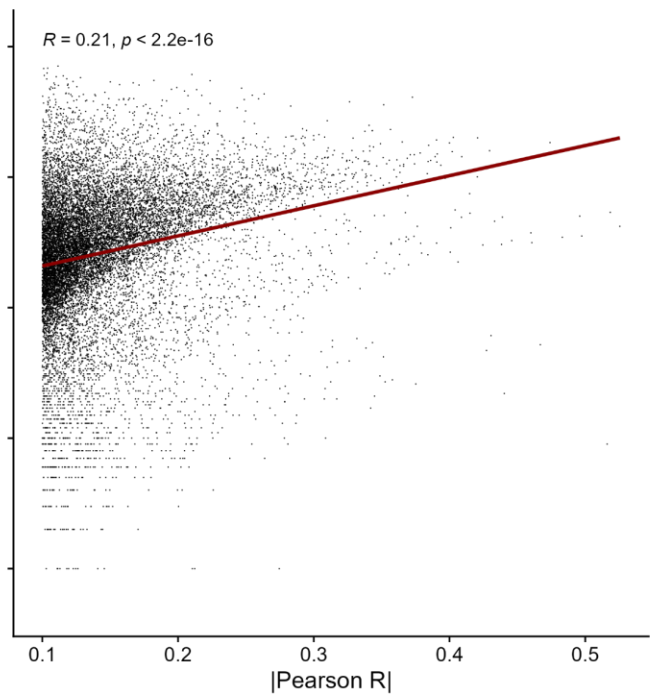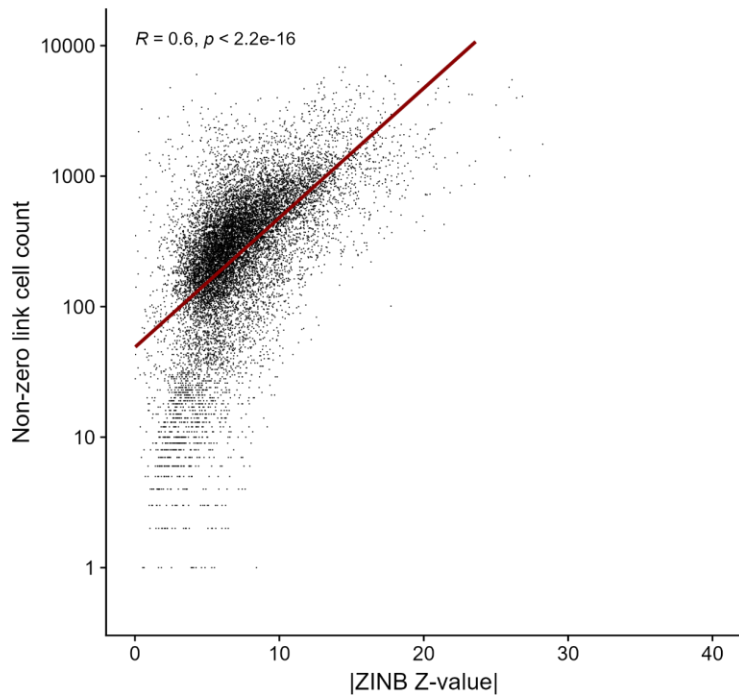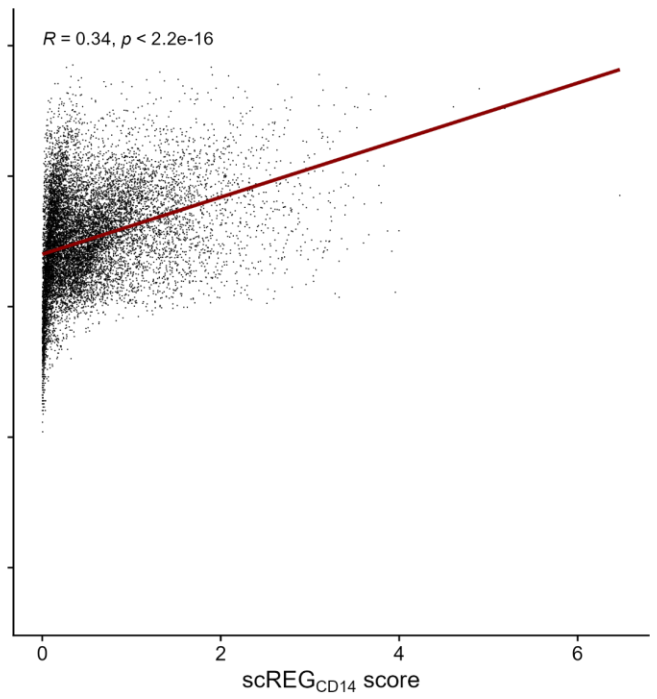

**Supplementary Figure 5.** The Z-scores method tends to output extreme statistics for peak-gene links that are identified in a few cells. In contrast, the statistics for the Pearson R, ZINB and scREG<sub>CD14</sub> methods are higher when there are more cells with non-zero counts (as expected given higher power to detect links). Z-scores, ZINB Z-values and Pearson R from links with  $|\text{Pearson R}| > 0.1$  were compared against the number of cells for which both the gene and the peak from that link had a non-zero read count. We found one outlier using ZINB which was removed for visualisation. On each plot, we added the Pearson R coefficient and corresponding P-value.

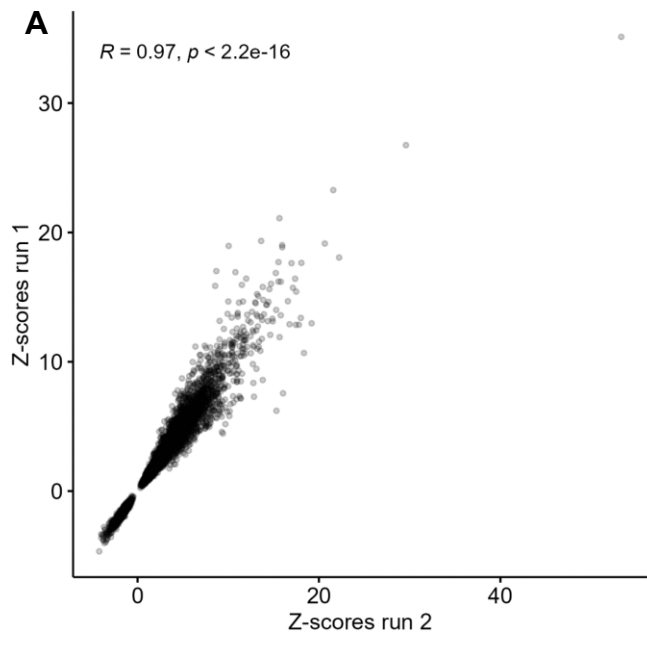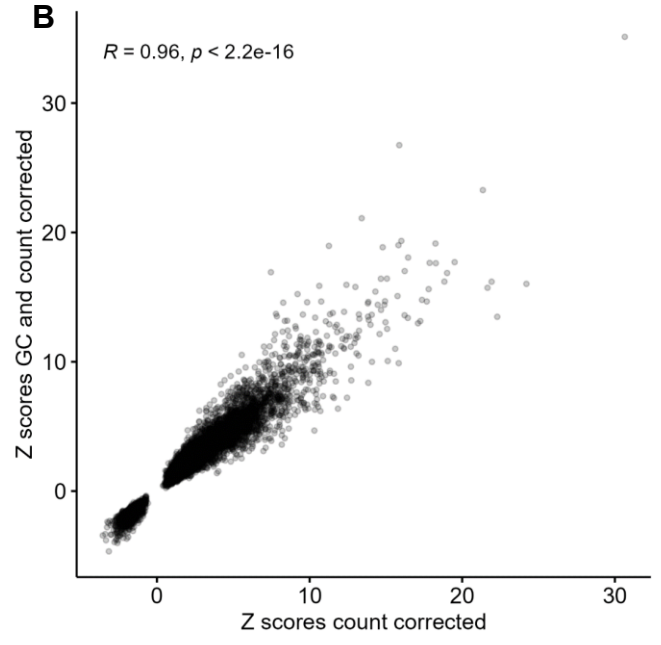

**Supplementary Figure 6.** Accounting for GC content has minimal impact on the peak-gene link statistics. **(A)** Distribution of Z-scores for 2 analyses of all peak-gene links with  $|\text{Pearson R}| > 0.1$  using the same model. The variability is due to the stochastic sampling of peaks to create null distributions. **(B)** Distribution of statistics comparing the Z-scores model matching peaks for both GC percent and counts ( $y$ -axis) or counts only ( $x$ -axis). On each plot, we added the Pearson R coefficient and corresponding P-value.

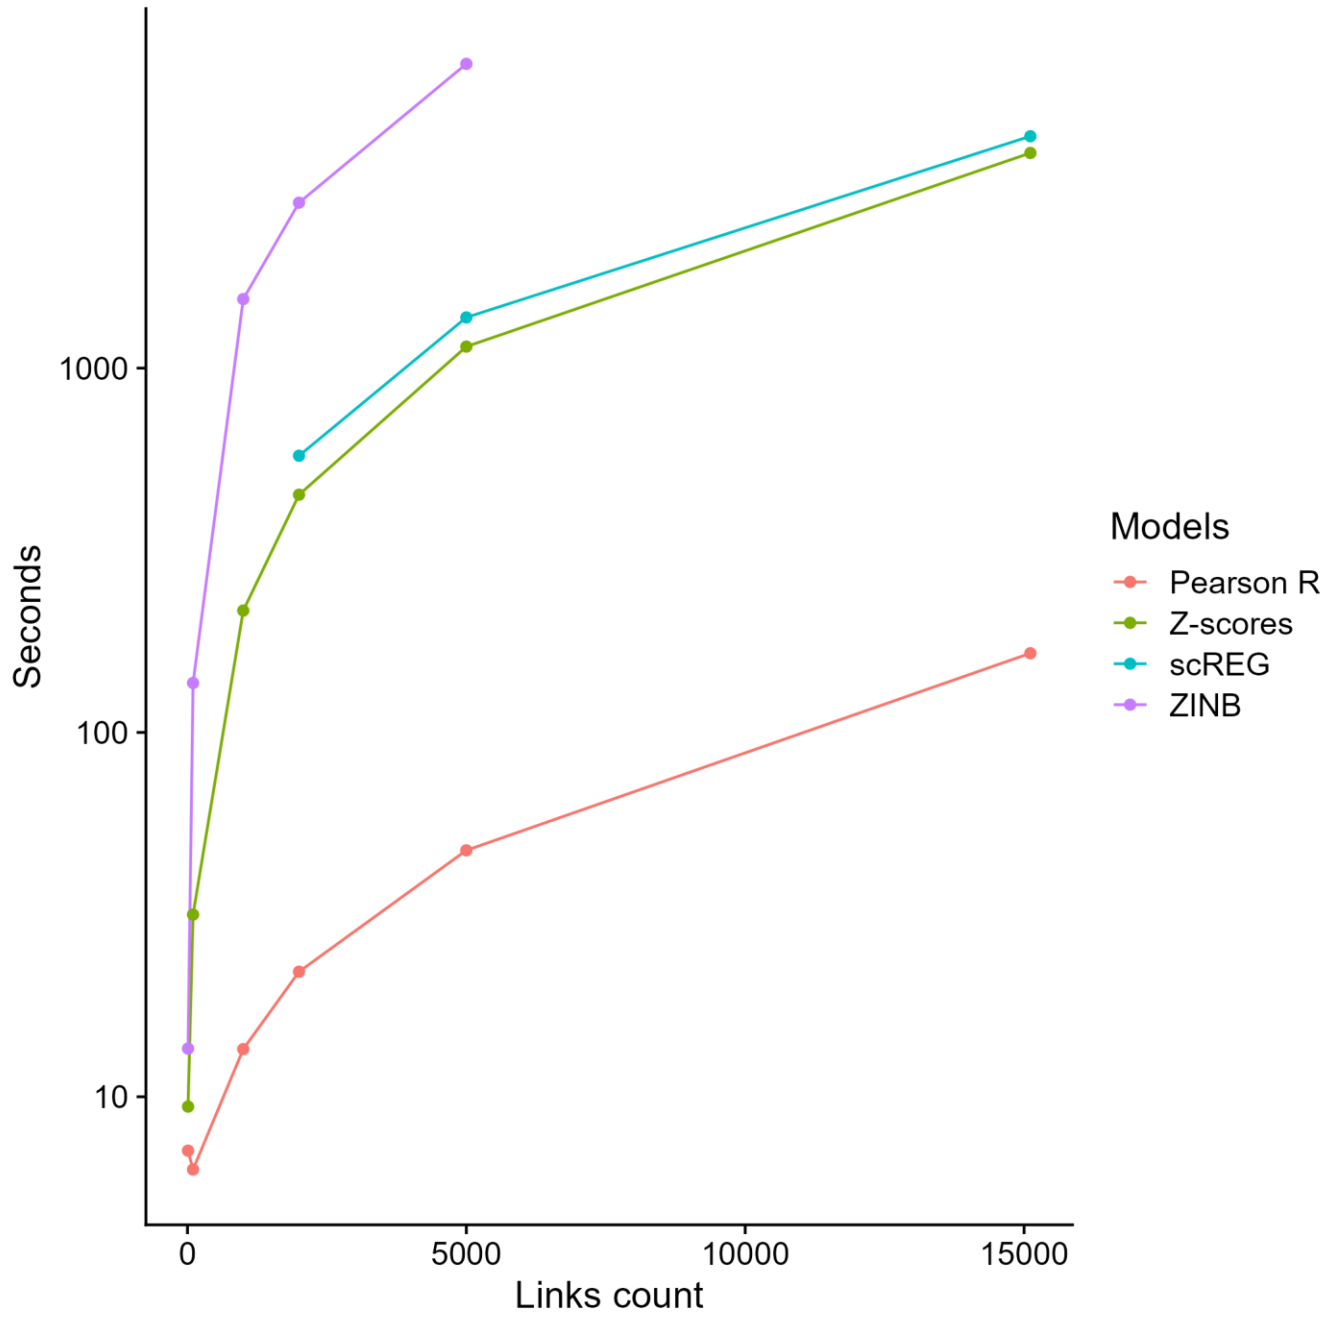

**Supplementary Figure 7.** The Pearson R provides an important scalability advantage. We benchmarked times to run each of the 4 models tested using 1 core with an AMD Ryzen 7 5800X 3,8GHz processor. For each model we tested 10, 100, 1000, 5000 and 15000 links except for ZINB which shows poor scalability. scREG returned errors for inputs with < 2000 links.

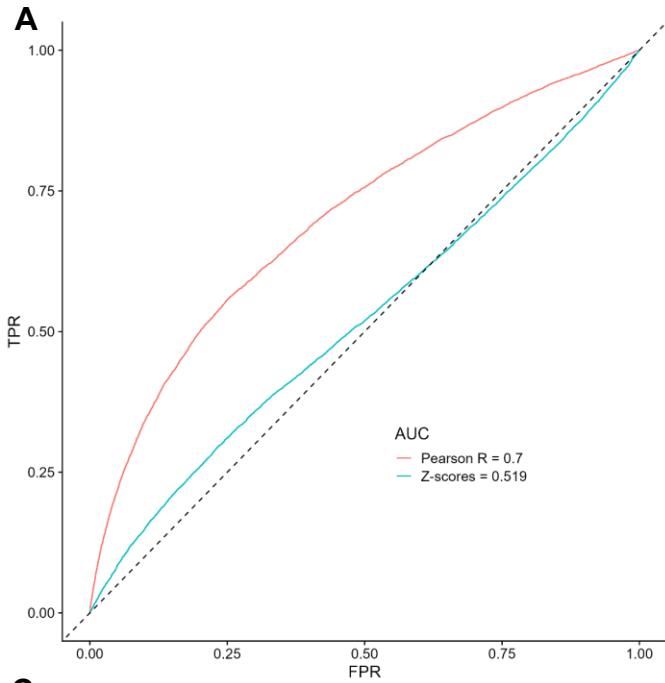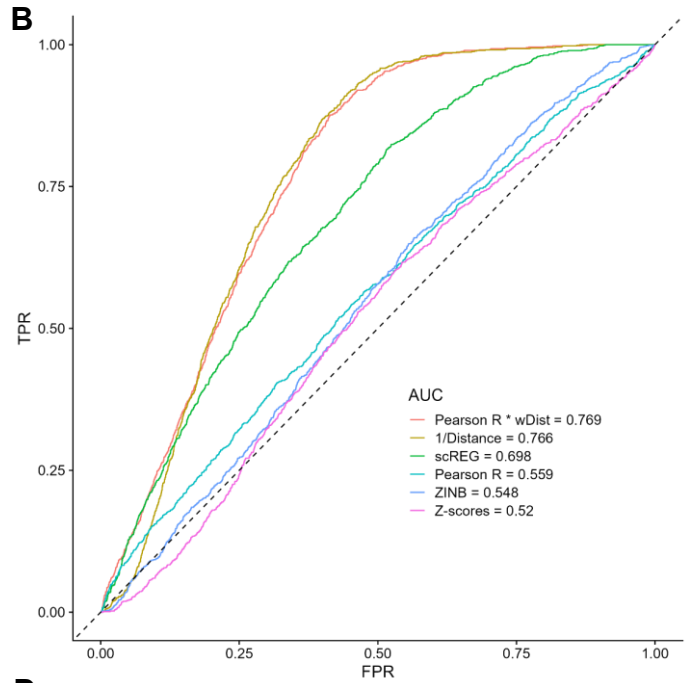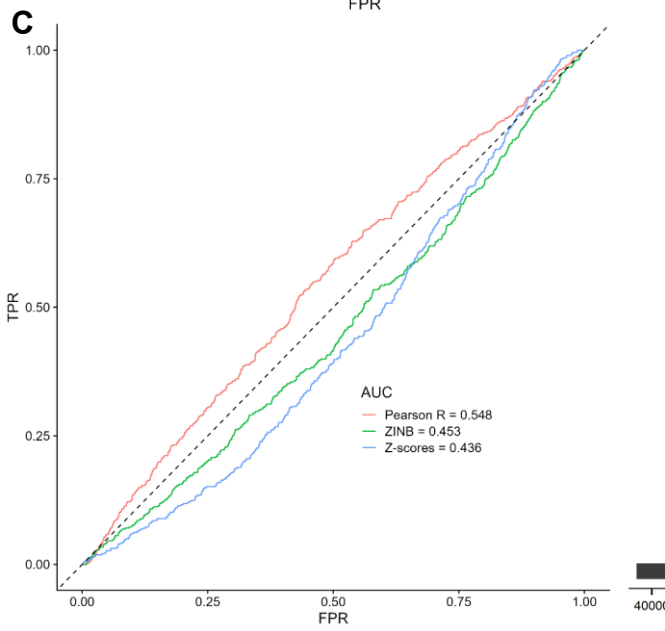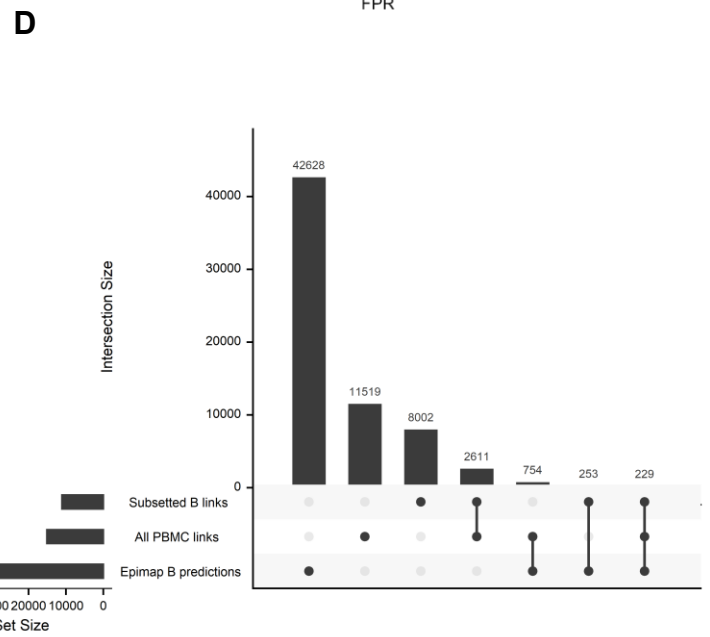

**Supplementary Figure 8.** The Pearson R method more accurately validates Epimap-predicted links between cCRE and target genes in B cells. **(A)** We used the Pearson R and Z-scores methods to detect links between ATACseq peaks and target genes (590,842 links with  $|\text{Pearson R}| > 0.01$ ) in the complete (i.e., using all PBMC to compute statistics) PBMC multiomic dataset. Then, we performed Receiving Operating Curves (ROC) analyses to compare the identified peak-gene links from the multiomic data with regulatory links in B cells predicted by the Epimap Project. **(B)** As in **A**, but using a smaller set of links defined using a more stringent statistical threshold (15,113 links with  $|\text{Pearson R}| > 0.1$ ). All cell-types are used to identify links, except for scREG which by design output link scores by cell-type (in this case, B cells). **(C)** As in **B**, but limiting these ROC analyses to links between ATACseq peaks and target genes with  $|\text{Pearson R}| > 0.1$  that were found in the B cells subset of the PBMC multiomic dataset. **(D)** Upset plot that shows the intersections of links identified between ATACseq peaks and target genes using either the full PBMC multiomic dataset or only the B cells subset with cCRE-gene regulatory links in B cells as predicted by the Epimap Project. ZINB; zero-inflated negative binomial, wDist; weighted distance ( $e^{-\text{distance}/200\text{kb}}$ ), TPR, true positive rate; FPR, false positive rate.



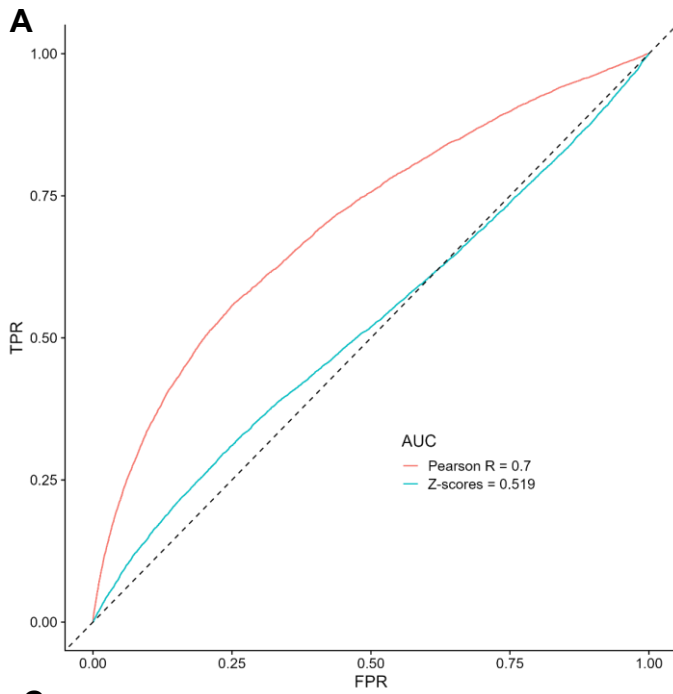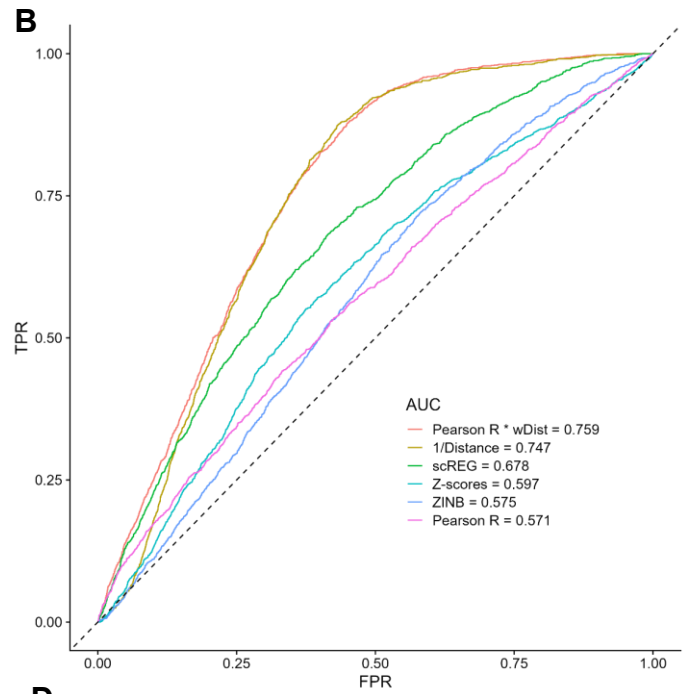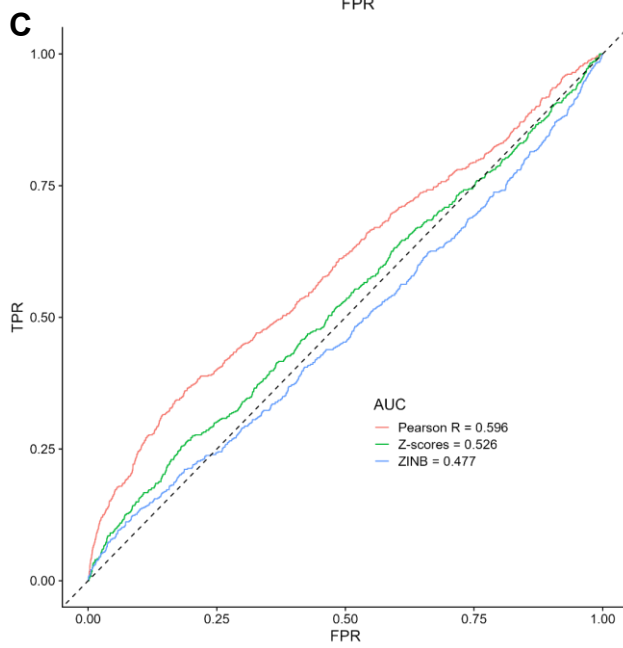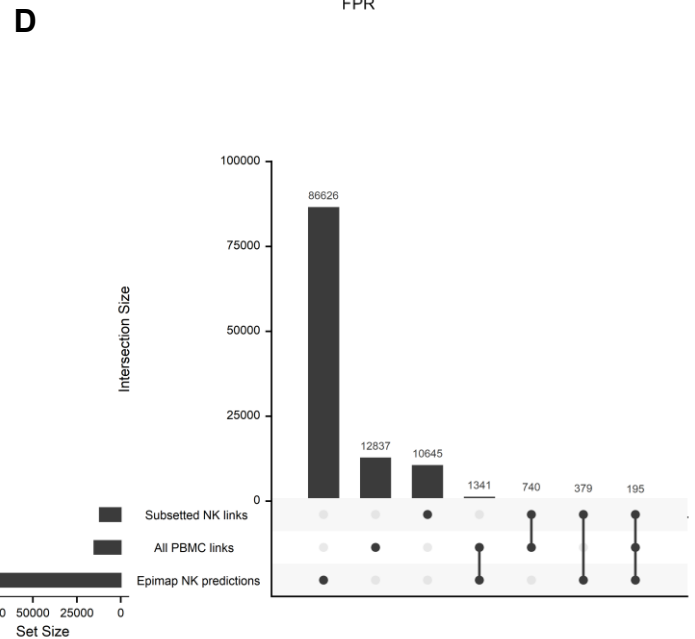

**Supplementary Figure 9.** The Pearson R method more accurately validates Epimap-predicted links between cCRE and target genes in NK cells. **(A)** We used the Pearson R and Z-scores methods to detect links between ATACseq peaks and target genes (590,842 links with  $|\text{Pearson R}| > 0.01$ ) in the complete (i.e., using all PBMC to compute statistics) PBMC multiomic dataset. Then, we performed Receiving Operating Curves (ROC) analyses to compare the identified peak-gene links from the multiomic data with regulatory links in NK cells predicted by the Epimap Project. **(B)** As in **A**, but using a smaller set of links defined using a more stringent statistical threshold (15,113 links with  $|\text{Pearson R}| > 0.1$ ). All cell-types are used to identify links, except for scREG which by design output link scores by cell-type (in this case, NK cells). **(C)** As in **B**, but limiting these ROC analyses to links between ATACseq peaks and target genes with  $|\text{Pearson R}| > 0.1$  that were found in the NK cells subset of the PBMC multiomic dataset. **(D)** Upset plot that shows the intersections of links identified between ATACseq peaks and target genes using either the full PBMC multiomic dataset or only the NK cells subset with cCRE-gene regulatory links in NK cells as predicted by the Epimap Project. ZINB; zero-inflated negative binomial, wDist; weighted distance ( $e^{-\text{distance}/200\text{kb}}$ ), TPR, true positive rate; FPR, false positive rate.

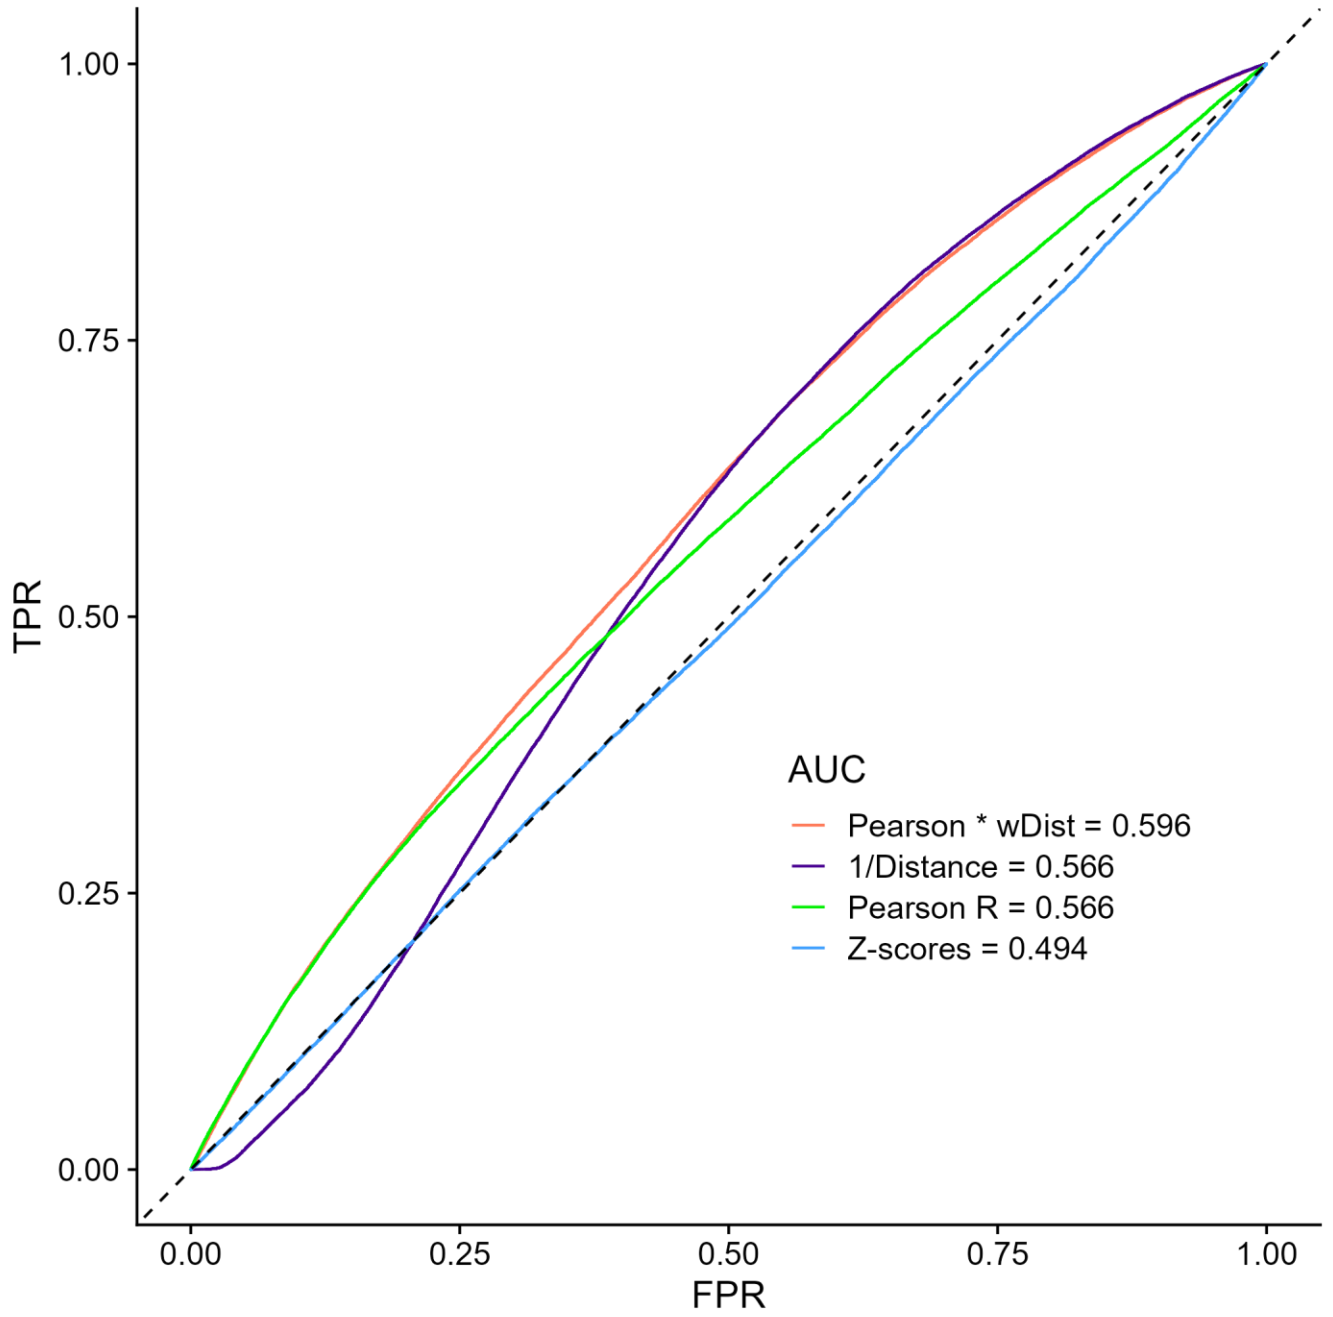

**Supplementary Figure 10.** The Pearson R method more accurately validates PChi-C-predicted links. We used the Pearson R and Z-scores methods to detect links between ATACseq peaks and target genes (590,842 links with  $|\text{Pearson R}| > 0.01$ ) in the PBMC multiomic dataset. Then, we performed Receiving Operating Curves (ROC) analyses to compare the identified peak-gene links from the multiomic data with links found in PChi-C (see Methods). wDist; weighted distance ( $e^{-\text{distance}/200\text{kb}}$ ), TPR, true positive rate; FPR, false positive rate.
